## Correction

# Correction: Glacial Lake Expansion in the Central Himalayas by Landsat Images, 1990–2010

The PLOS ONE Staff

In the Data and Methods section, there are errors in the first and second equations. Please view the correct equations here:

$$NDWI_{TM} = (Green - NIR) / (Green + NIR) \text{ or} \\ NDWI_{TM} = (BAND2 - BAND4) / (BAND2 + BAND4) \quad (1)$$

$$NDSII_{TM} = (Red - SWIR) / (Red + SWIR) \text{ or} \\ NDSII_{TM} = (BAND3 - BAND5) / (BAND3 + BAND5) \quad (2)$$

## Reference

1. Nie Y, Liu Q, Liu S (2013) Glacial Lake Expansion in the Central Himalayas by Landsat Images, 1990–2010. PLoS ONE 8(12): e83973. doi:10.1371/journal.pone.0083973

**Citation:** The PLOS ONE Staff (2014) Correction: Glacial Lake Expansion in the Central Himalayas by Landsat Images, 1990–2010. PLoS ONE 9(3): e92654. doi:10.1371/journal.pone.0092654

**Published:** March 18, 2014

**Copyright:** © 2014 The PLOS ONE Staff. This is an open-access article distributed under the terms of the Creative Commons Attribution License, which permits unrestricted use, distribution, and reproduction in any medium, provided the original author and source are credited.
